# Supplementary material for: Quercetin induces the selective uptake of HDL-cholesterolviapromoting SR-BI expression and the activation of the PPARγ/LXRα pathway
Source: Royal Society of Chemistry journal article supplement (doi:10.1039/c7fo01107e), 2017-12-08
Supplement: c7fo01107e1.pdf [file c7fo01107e1.pdf]

**Fig. S1** Effects of quercetin on the expressions of ABCA1/G1, SREBP-1c, SCD-1 and FASN in HepG2 cells. Cells were treated with 15  $\mu$ M quercetin for 24 h. Then, qPCR was used to measure ABCA1/G1, SREBP-1c, SCD-1 and FASN mRNA levels. All data were from three independent experiments performed in triplicate and were expressed as means  $\pm$  SD. \*P <0.05 vs control group, n=3.
